# Supplementary material for: The hydrocortisone-responsive urinary metabolome of premature infants
Source: PubMed Central journal article supplement (PMC10589081; doi:10.1038/s41390-023-02610-5), 2023-05-03
Supplement: 41390_2023_2610_MOESM3_ESM.pdf [file 41390_2023_2610_MOESM3_ESM.pdf]

Supplemental Table S3. Direction of change by Super Pathway for HC-responsive named metabolites with post/pre value at  $p < 0.05$

| Super Pathway      | Decreased Abundance |           | Increased Abundance |           |
|--------------------|---------------------|-----------|---------------------|-----------|
|                    | n (% of total)      | Post/Pre  | n                   | Post/Pre  |
| Amino Acid         | 40 (85.1)           | 0.67±0.12 | 7                   | 2.07±0.09 |
| Carbohydrate       | 17 (100)            | 0.73±0.10 | 0                   |           |
| Cofactors/vitamins | 8 (87.5)            | 0.67±0.06 | 1                   | 2.49      |
| Energy             | 6 (100)             | 0.64±0.08 | 0                   |           |
| Lipid              | 23 (88.5)           | 0.57±0.19 | 3                   | 2.12±0.52 |
| Nucleotide         | 15 (100)            | 0.75±0.06 | 0                   |           |
| Peptide            | 12 (100)            | 0.48±0.10 | 0                   |           |
| Xenobiotics        | 11 (78.6)           | 0.64±0.13 | 3                   | 1.64±0.32 |

Post/pre abundance is mean/sd of median values for 146 named metabolites in 14 HC-treated infants. n=number of metabolites. 79-100% of metabolites influenced by HC decrease abundance by 27-52%.

Supplemental Table S4. Clinical parameters for infants at age 23-30 days in the cross-sectional analysis of HC treatment.

|                                         | TOLSURF    |            |       | PROP       |            |        |
|-----------------------------------------|------------|------------|-------|------------|------------|--------|
|                                         | HC         | No HC      | p     | HC         | No HC      | p      |
| Number of Infants                       | 23         | 135        | -     | 41         | 102        | -      |
| Maternal Race<br>(Black Hispanic White) | 15 6 2     | 66 47 22   | 0.59  | 20 14 7    | 46 40 16   | 0.32   |
| Gestational Age (wk)                    | 25.0 (1.2) | 25.4 (1.2) | 0.13  | 25.4 (1.1) | 26.1 (1.1) | 0.0009 |
| Male sex (%)                            | 65         | 57         | 0.50  | 54         | 52         | 1.00   |
| Birthweight (g)                         | 741 (178)  | 720 (179)  | 0.61  | 737 (148)  | 804 (146)  | 0.01   |
| Average RSS d 7-14                      | 4.9 (2.0)  | 4.0 (1.8)  | 0.019 | 2.6 (1.8)  | 2.6 (1.5)  | 0.88   |
| BPD at 36 weeks (%)                     | 61         | 63         | 0.56  | 51         | 51         | 1.00   |
| On TPN (%)                              | 74         | 61         | 0.43  | 76         | 52         | 0.01   |

Data are mean (sd)
